# Supplementary material for: On the mass spectrometric fragmentations of the bacterial sesterterpenes sestermobaraenes A–C
Source: publisher site journal article supplement (doi:10.3762/bjoc.16.231), 2020-11-19
Supplement: Additional file 1 [file 1860-5397-16-231-S1.pdf]

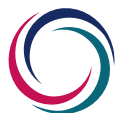

## Supporting Information

for

### **On the mass spectrometric fragmentations of the bacterial sesterterpenes sestermobaraenes A–C**

Anwei Hou and Jeroen S. Dickschat

*Beilstein J. Org. Chem.* **2020**, *16*, 2807–2819. doi:10.3762/bjoc.16.231

### **Mass spectra of the unlabelled and $^{13}\text{C}$ -labelled compounds 1–3, and the cyclisation mechanism from GFPP to 1–3 by SmTS1**

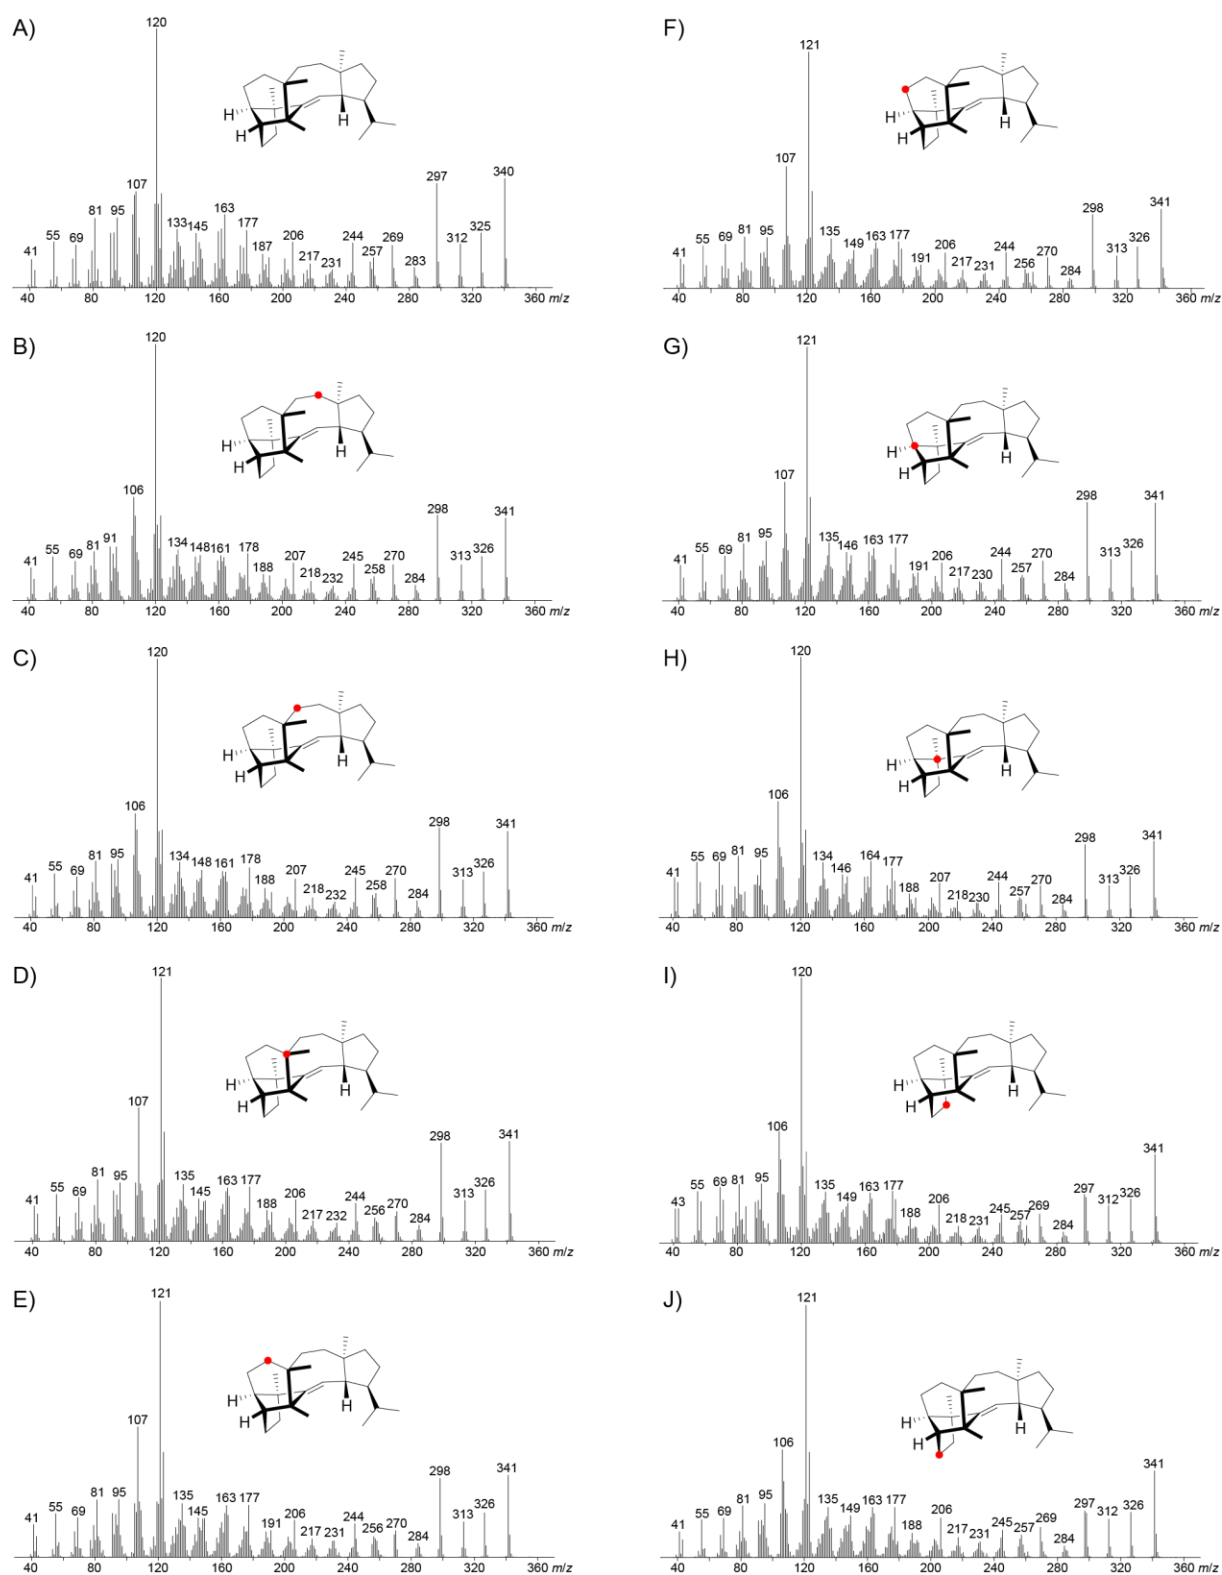

**Figure S1:** EI mass spectra of A) unlabelled **1** and of B)–J) ( $^{13}\text{C}$ )-**1** with labellings at carbons C1–C9. Red dots indicate  $^{13}\text{C}$ -labelled carbons.

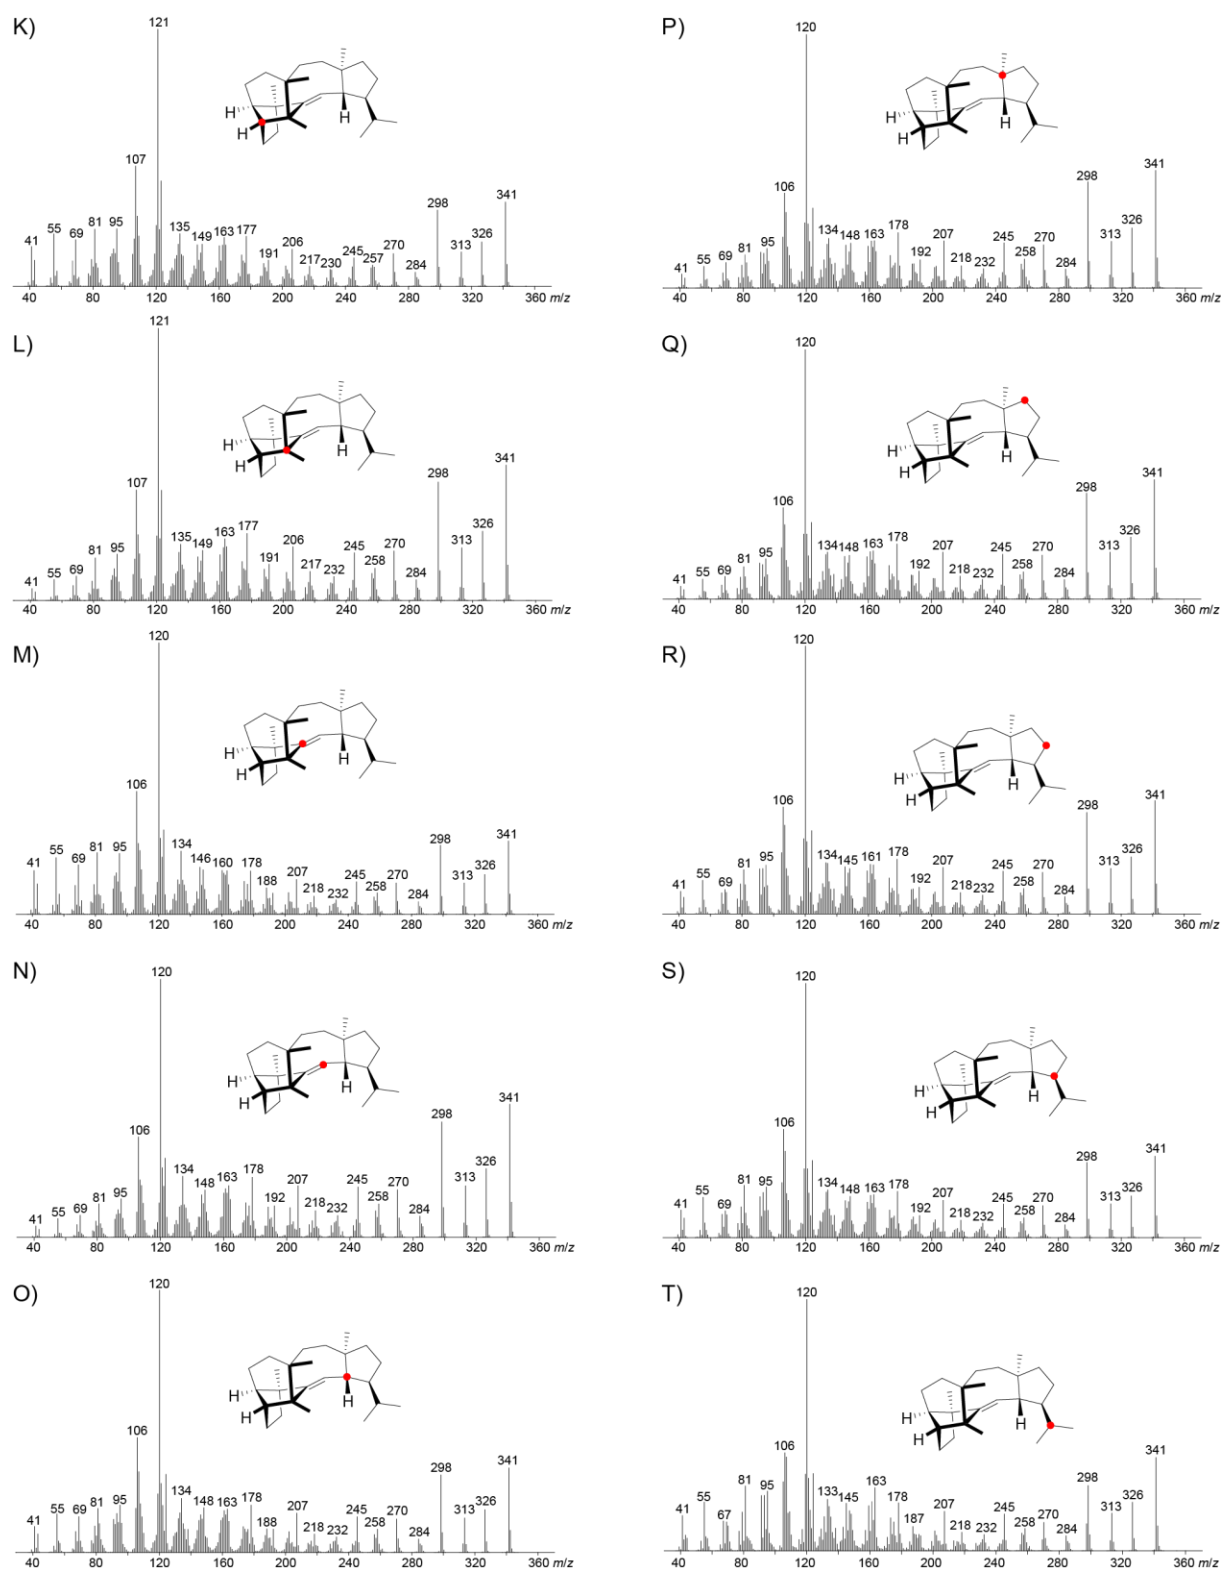

**Figure S1 (continued):** EI mass spectra of K)–T) ( $^{13}\text{C}$ )-1 with labellings at carbons C10–C19. Red dots indicate  $^{13}\text{C}$ -labelled carbons.

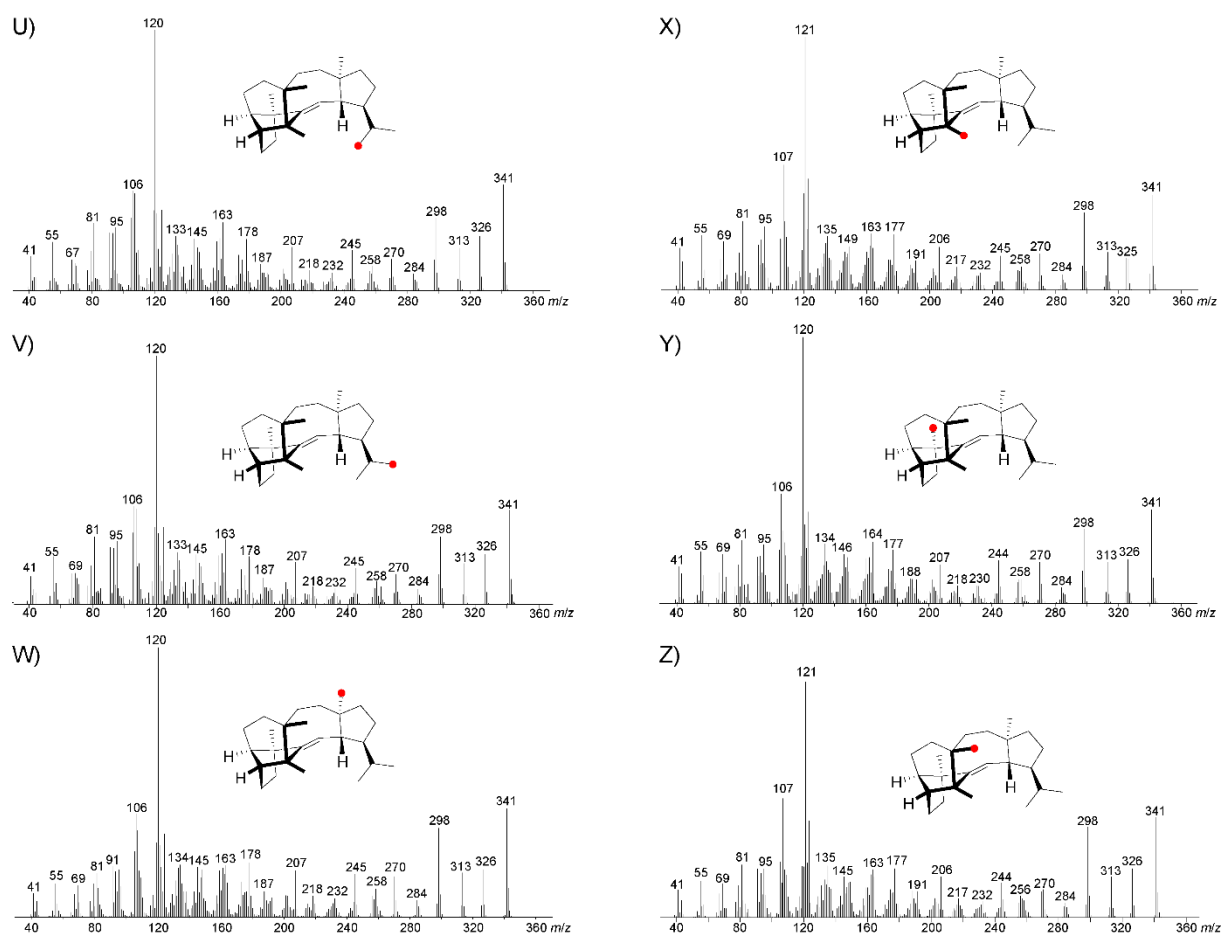

**Figure S1 (continued):** EI mass spectra of U)–Z)  $(^{13}\text{C})$ -1 with labellings at carbons C20–C25. Red dots indicate  $^{13}\text{C}$ -labelled carbons.

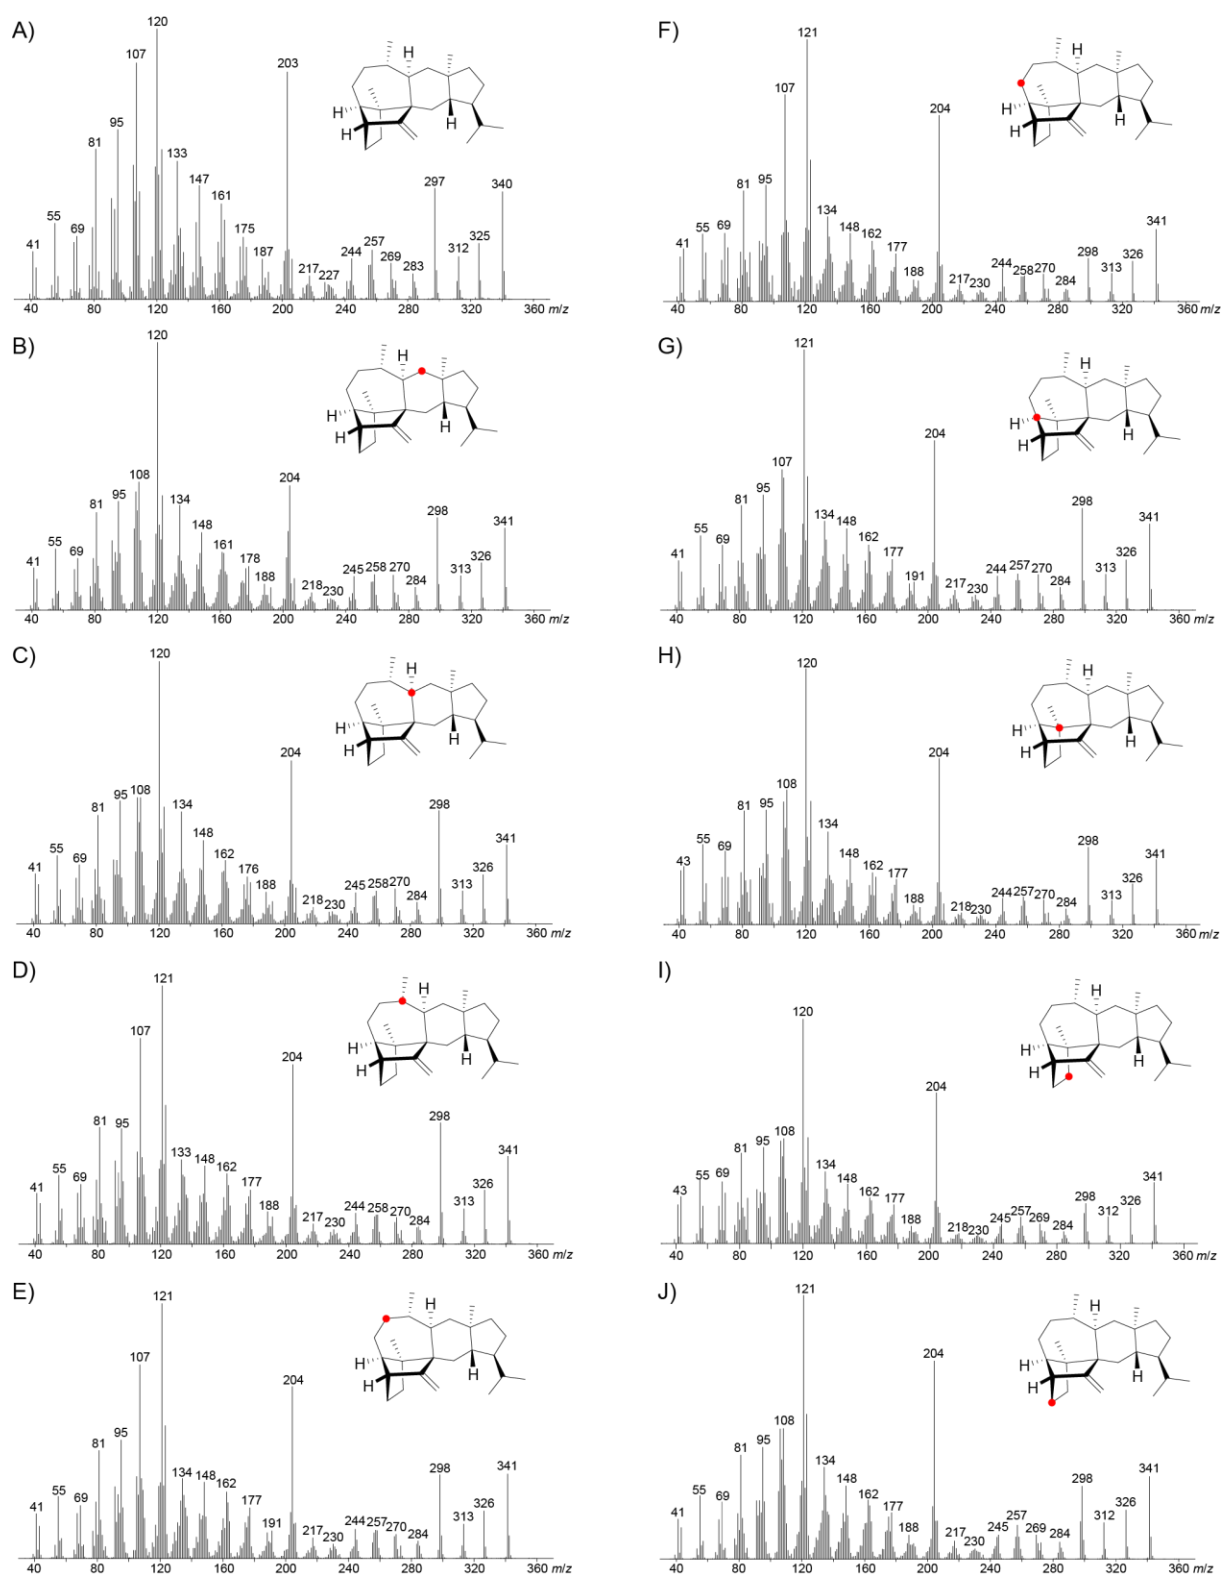

**Figure S2:** EI mass spectra of A) unlabelled **2** and of B)–J) ( $^{13}\text{C}$ )-**2** with labellings at carbons C1–C9. Red dots indicate  $^{13}\text{C}$ -labelled carbons.

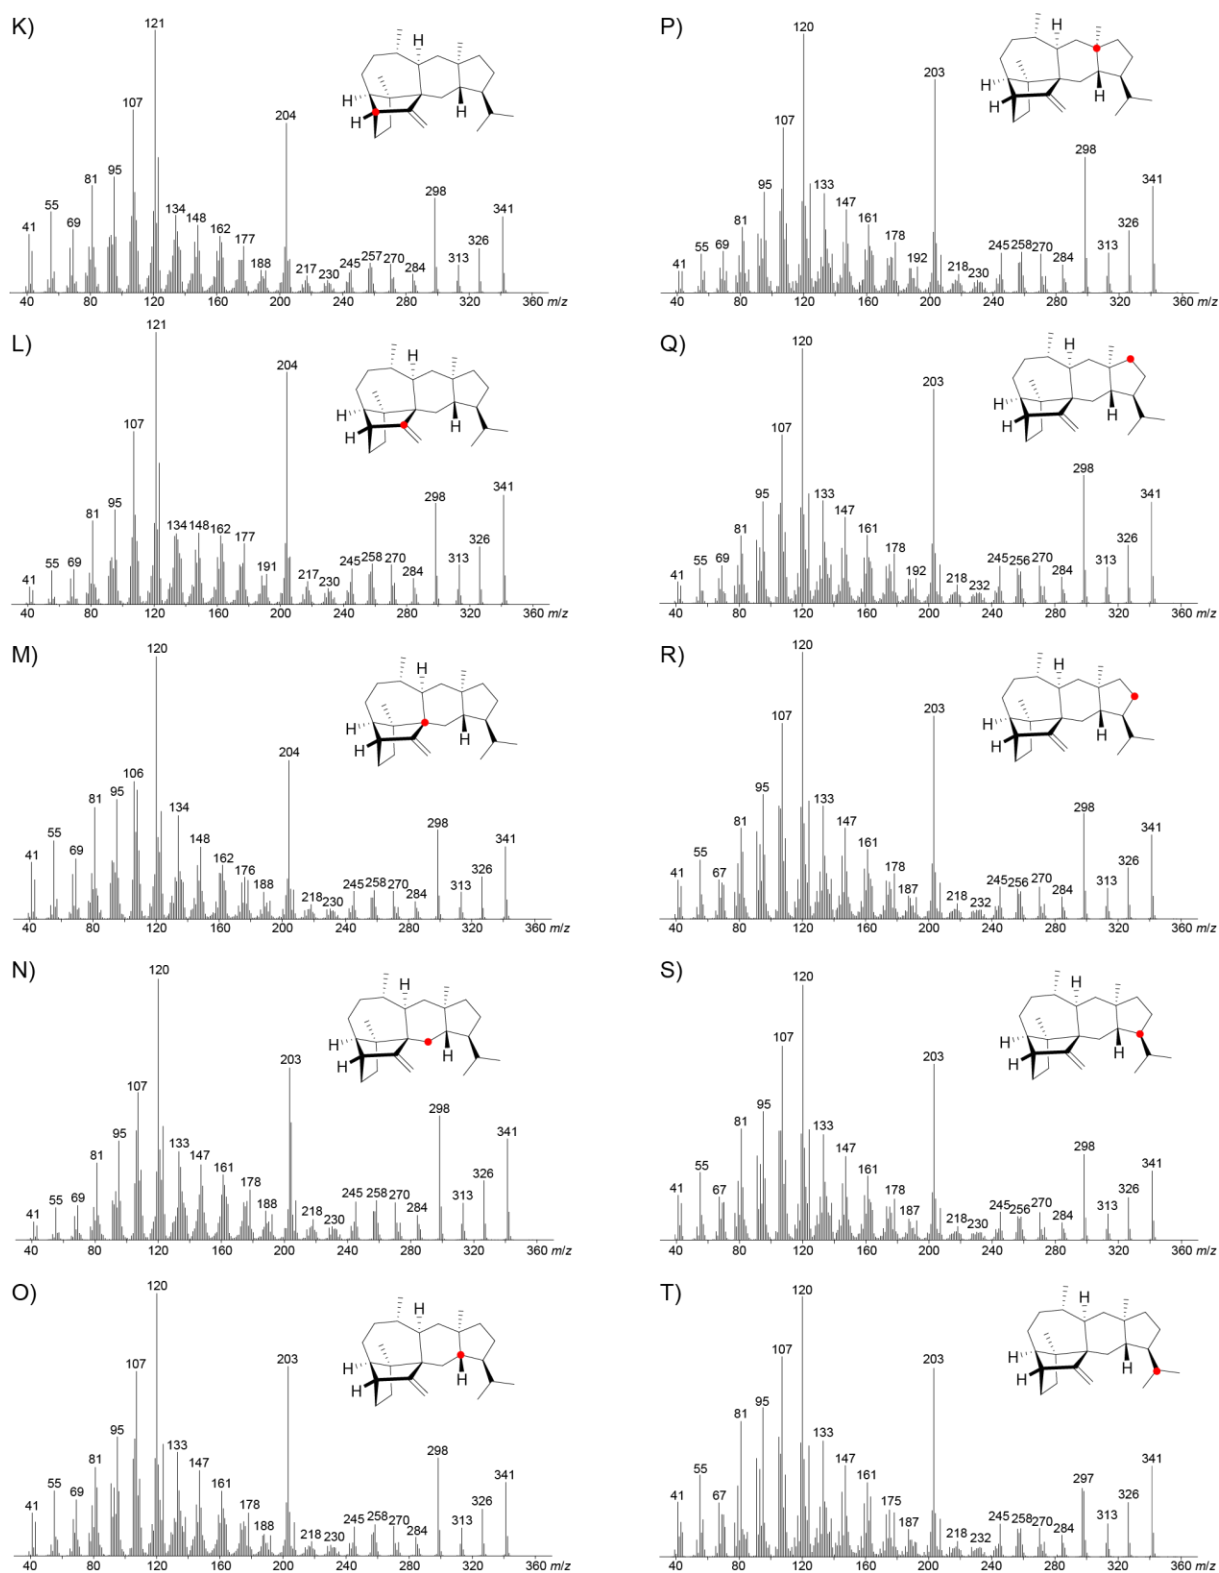

**Figure S2 (continued):** EI mass spectra of K)–T) ( $^{13}\text{C}$ )-2 with labellings at carbons C10–C19. Red dots indicate  $^{13}\text{C}$ -labelled carbons.

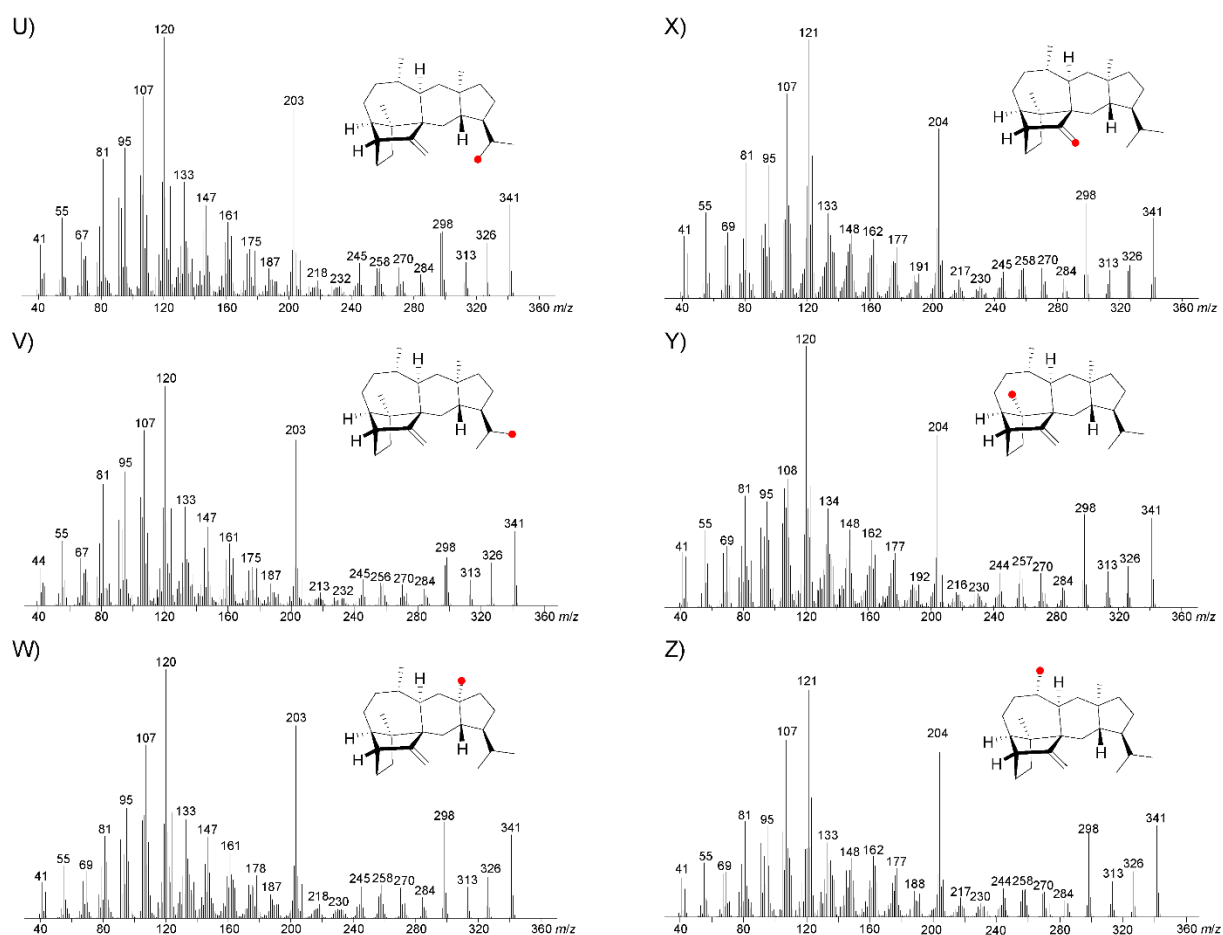

**Figure S2 (continued):** EI mass spectra of U)–Z) ( $^{13}\text{C}$ )-2 with labellings at carbons C20–C25. Red dots indicate  $^{13}\text{C}$ -labelled carbons.

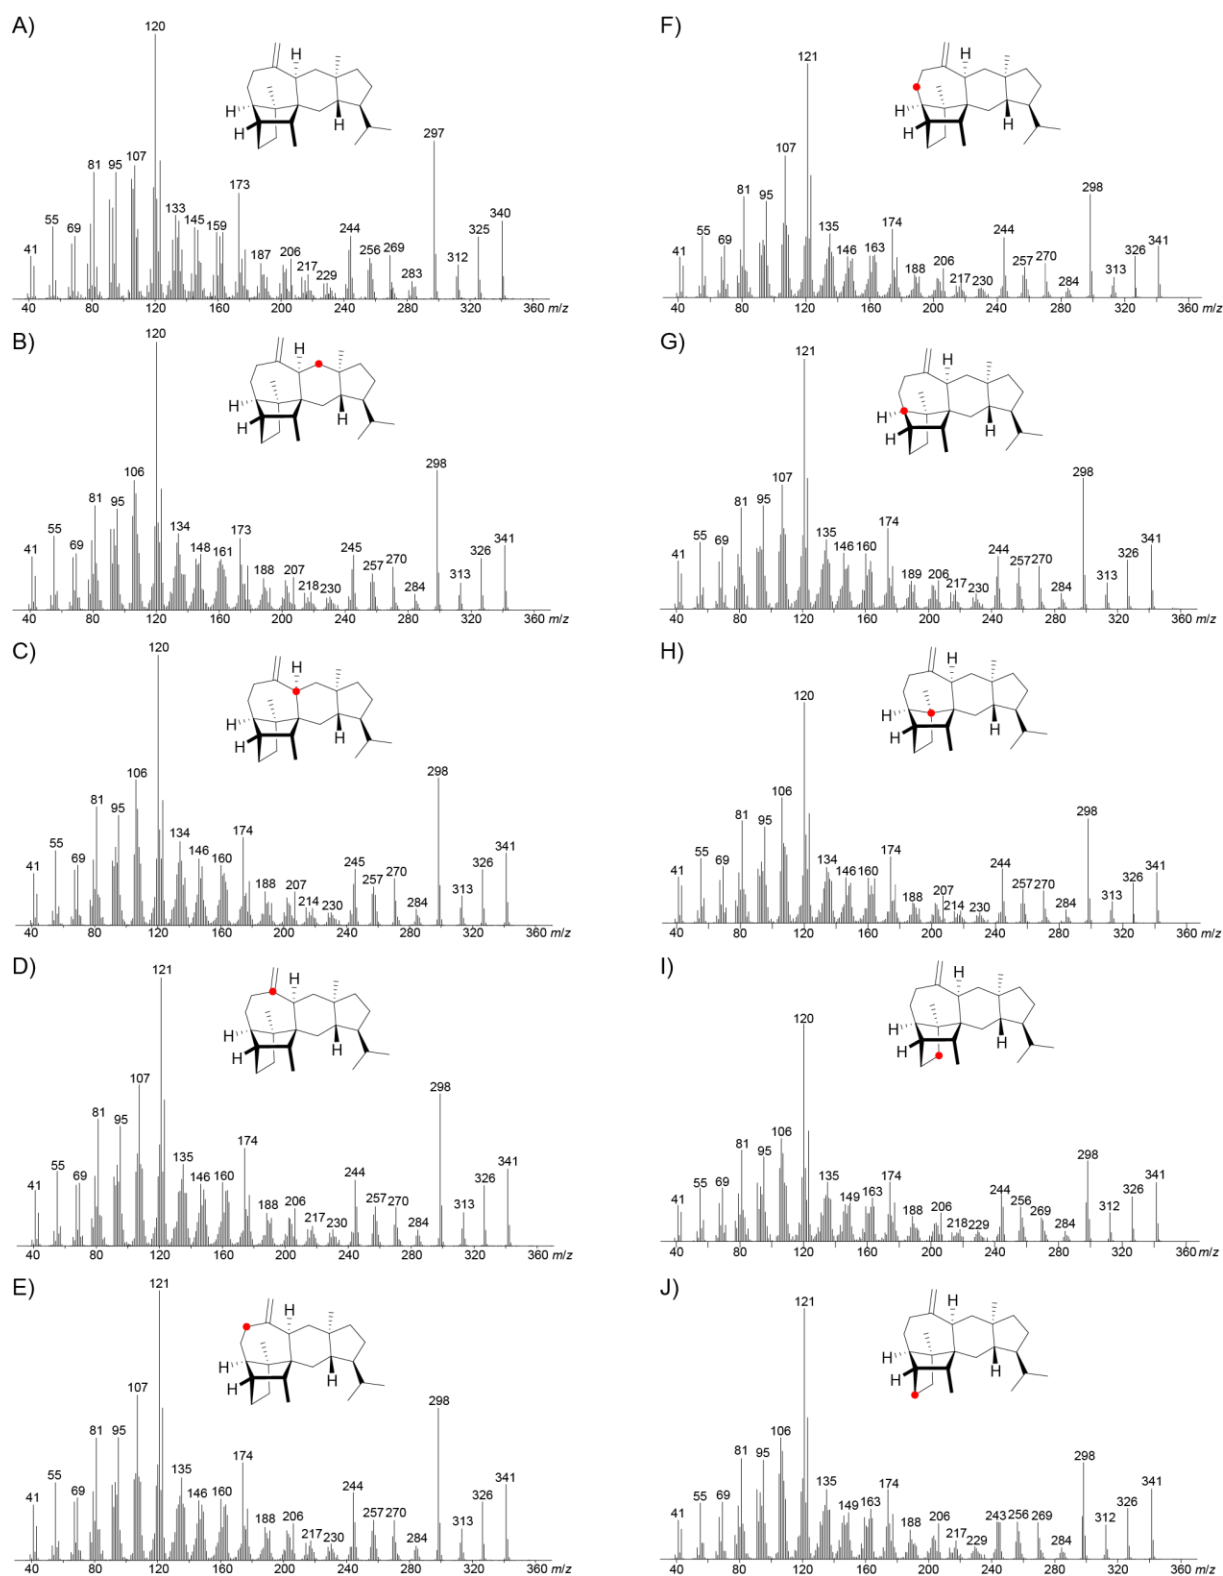

**Figure S3:** EI mass spectra of A) unlabelled **3** and of B)–J)  $^{13}\text{C}$ -**1** with labellings at carbons C1–C9. Red dots indicate  $^{13}\text{C}$ -labelled carbons.



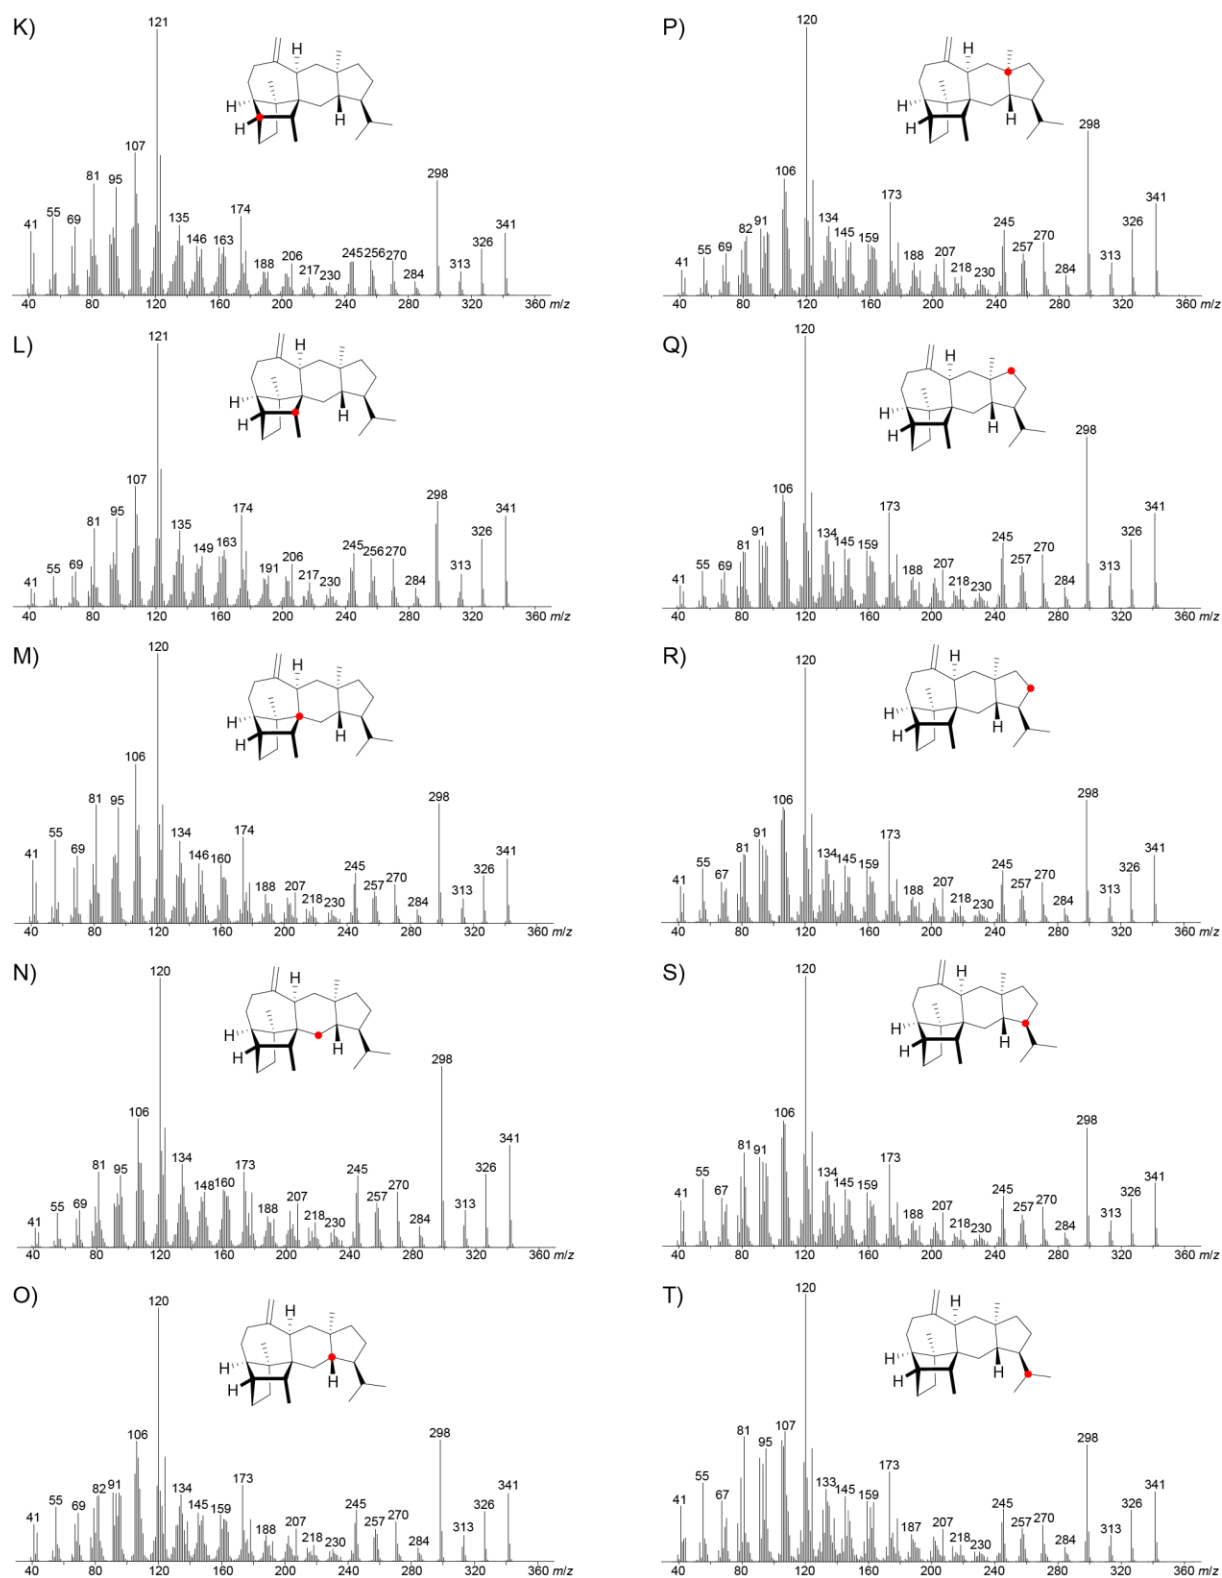

**Figure S3 (continued):** EI mass spectra of K)–T)  $(^{13}\text{C})\text{-3}$  with labellings at carbons C10–C19. Red dots indicate  $^{13}\text{C}$ -labelled carbons.

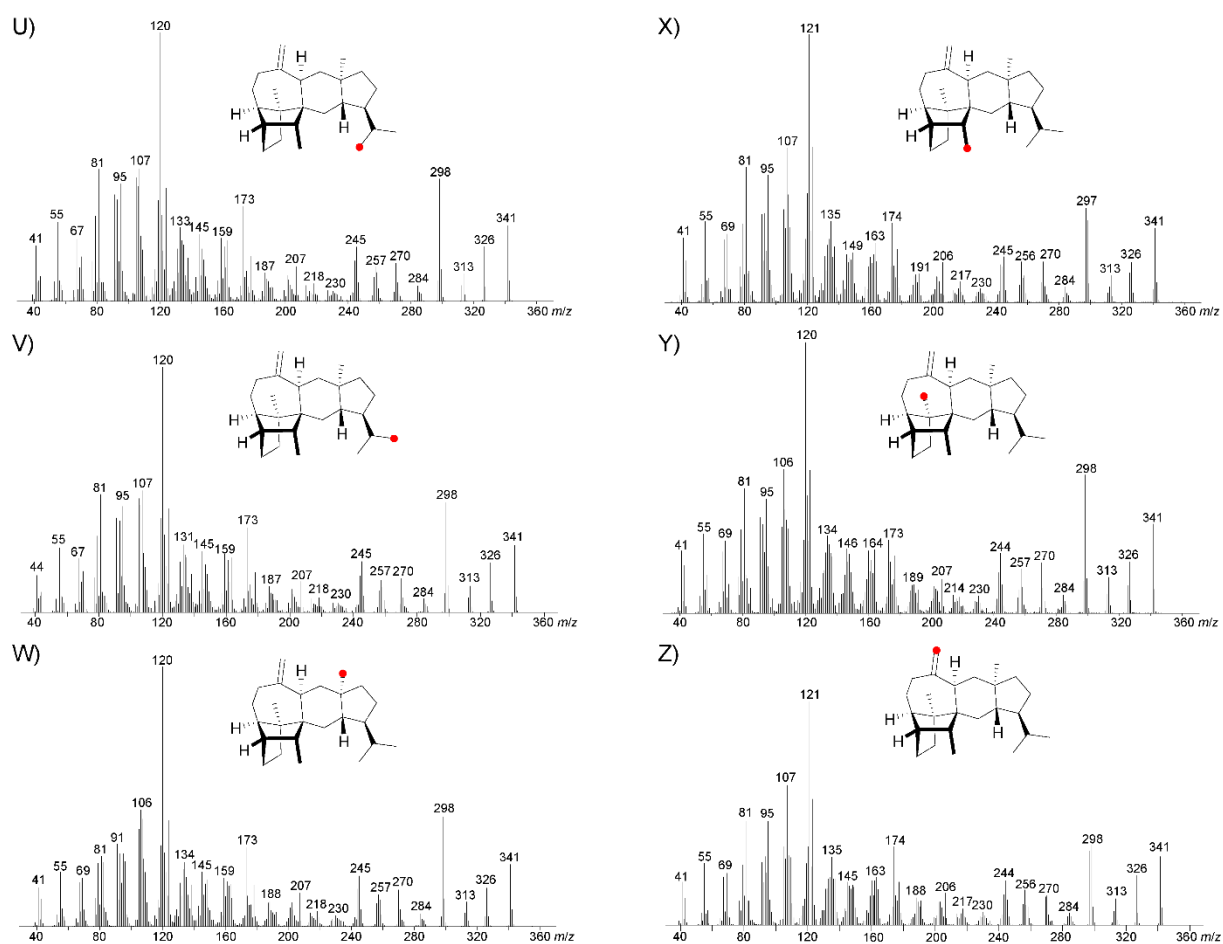

**Figure S3 (continued):** EI mass spectra of U)–Z) ( $^{13}\text{C}$ )-3 with labellings at carbons C20–C25. Red dots indicate  $^{13}\text{C}$ -labelled carbons.

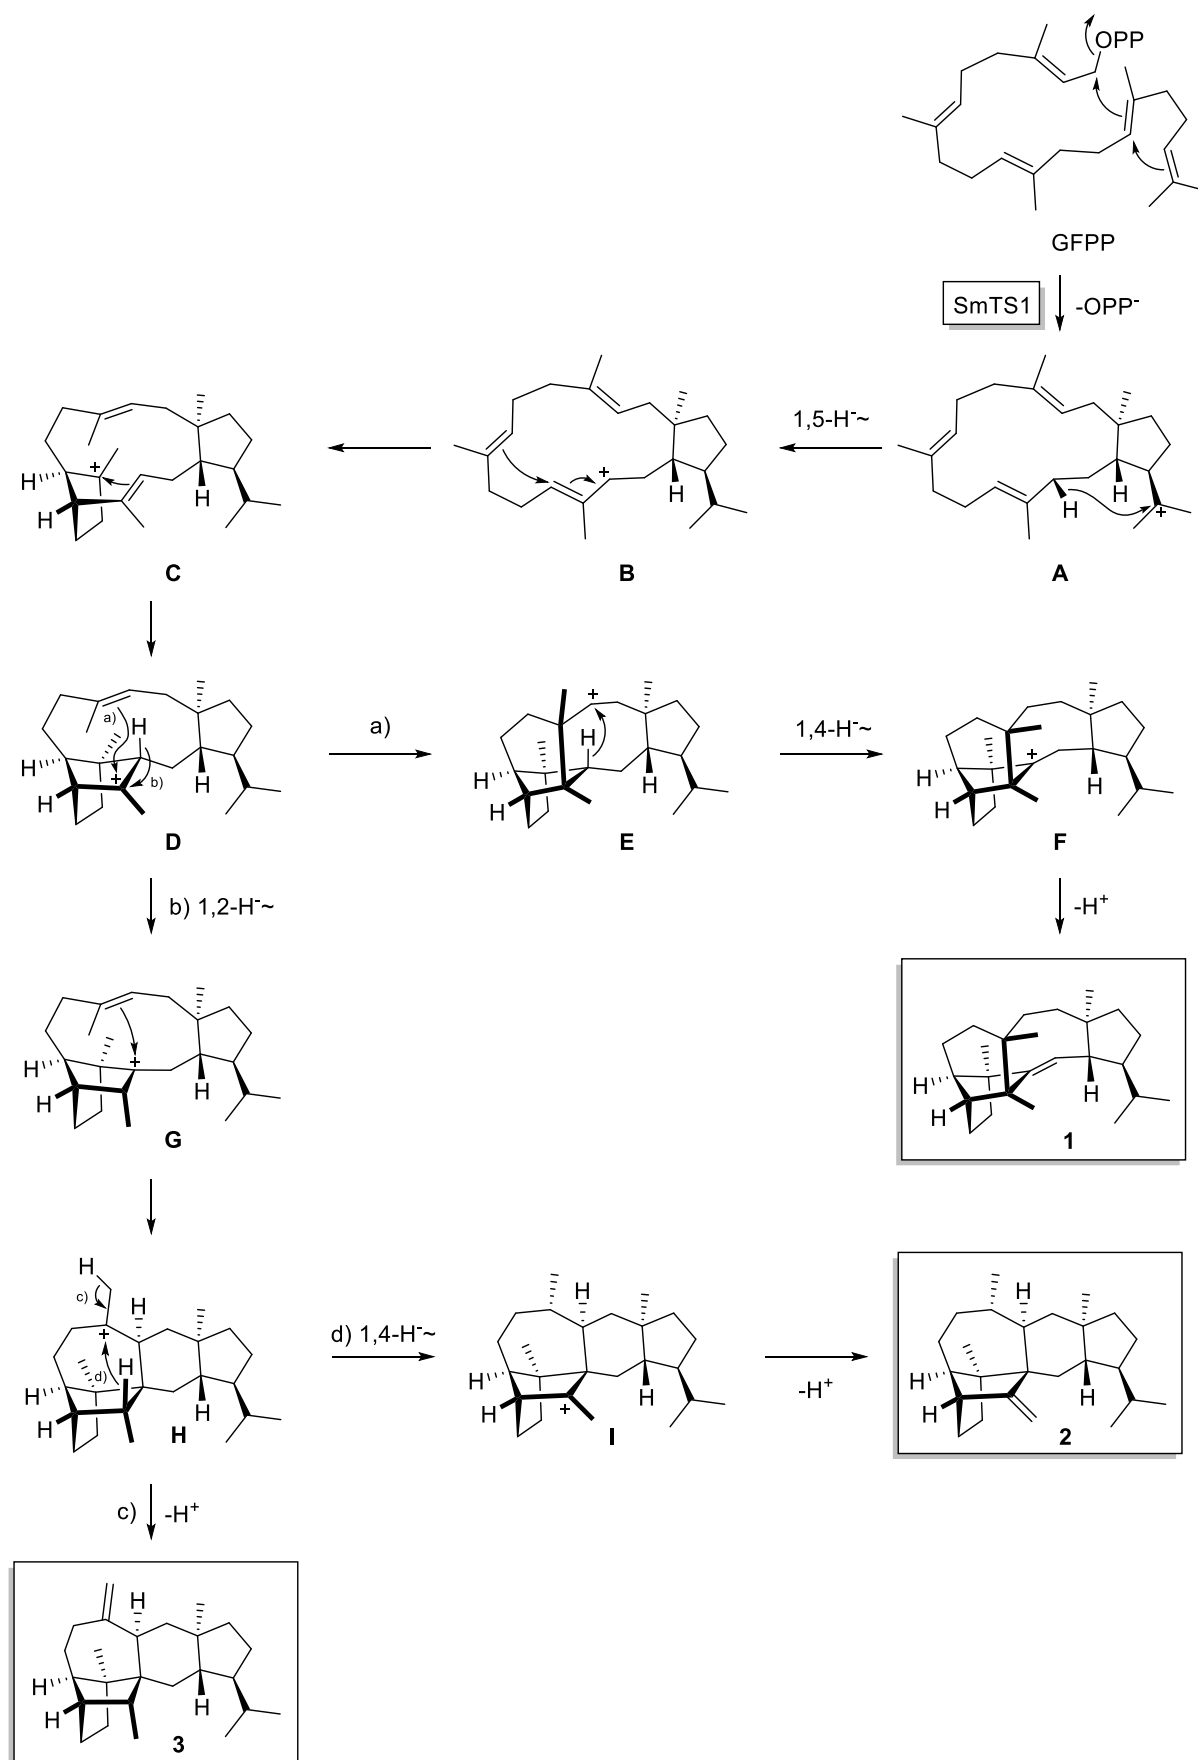

**Scheme S1:** Cyclisation mechanism from GFPP to 1–3 by SmTS1.
